# Supplementary material
Source: publisher site journal article supplement (https://www.dovepress.com/article/552936)
Supplement: Supplementary file 1 [file 552936%20Revised%20%252509Supplementary%20Materials.pdf]

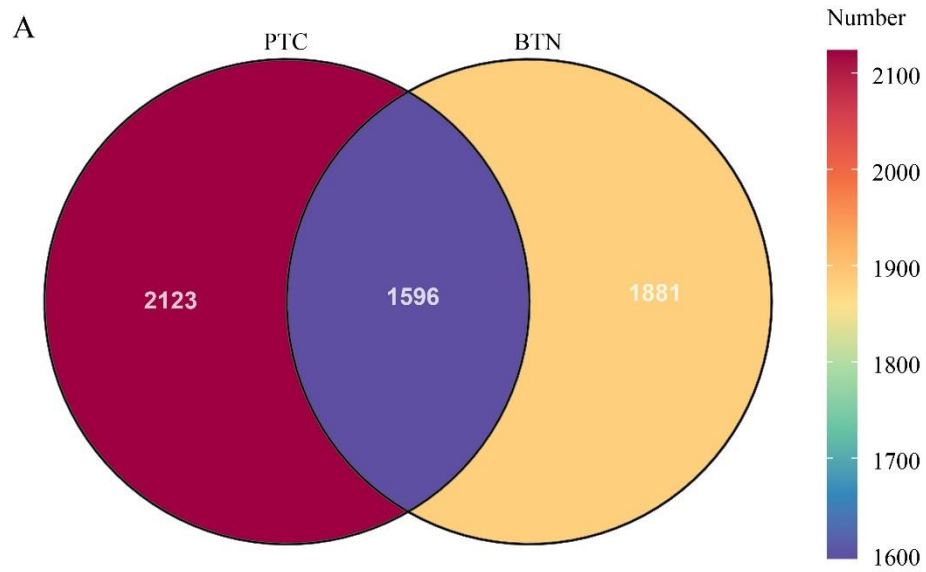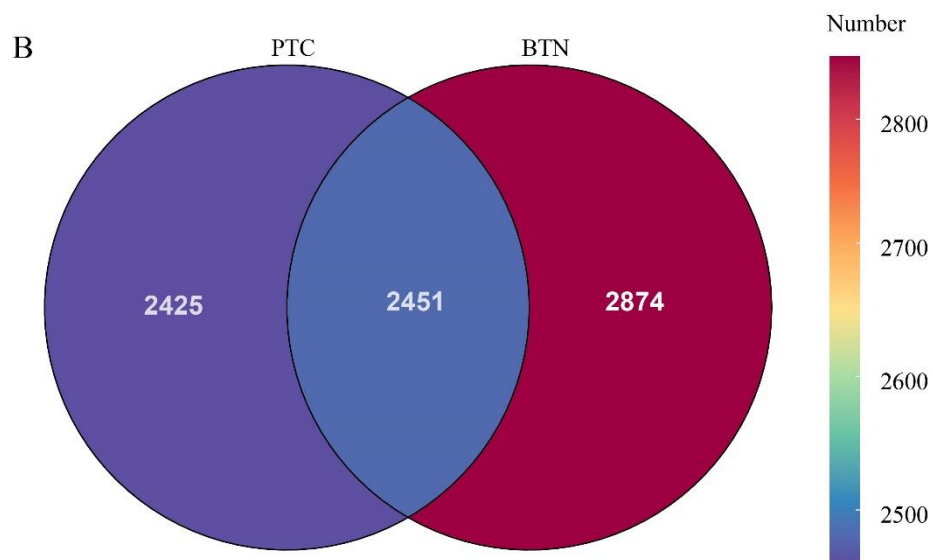

**Supplementary Figure 1** Venn diagram showing ASV of the groups. **(A)** The ASV of oral samples. **(B)** The ASV of fecal samples. PTC, Papillary thyroid carcinoma; BTN, Benign thyroid nodules.

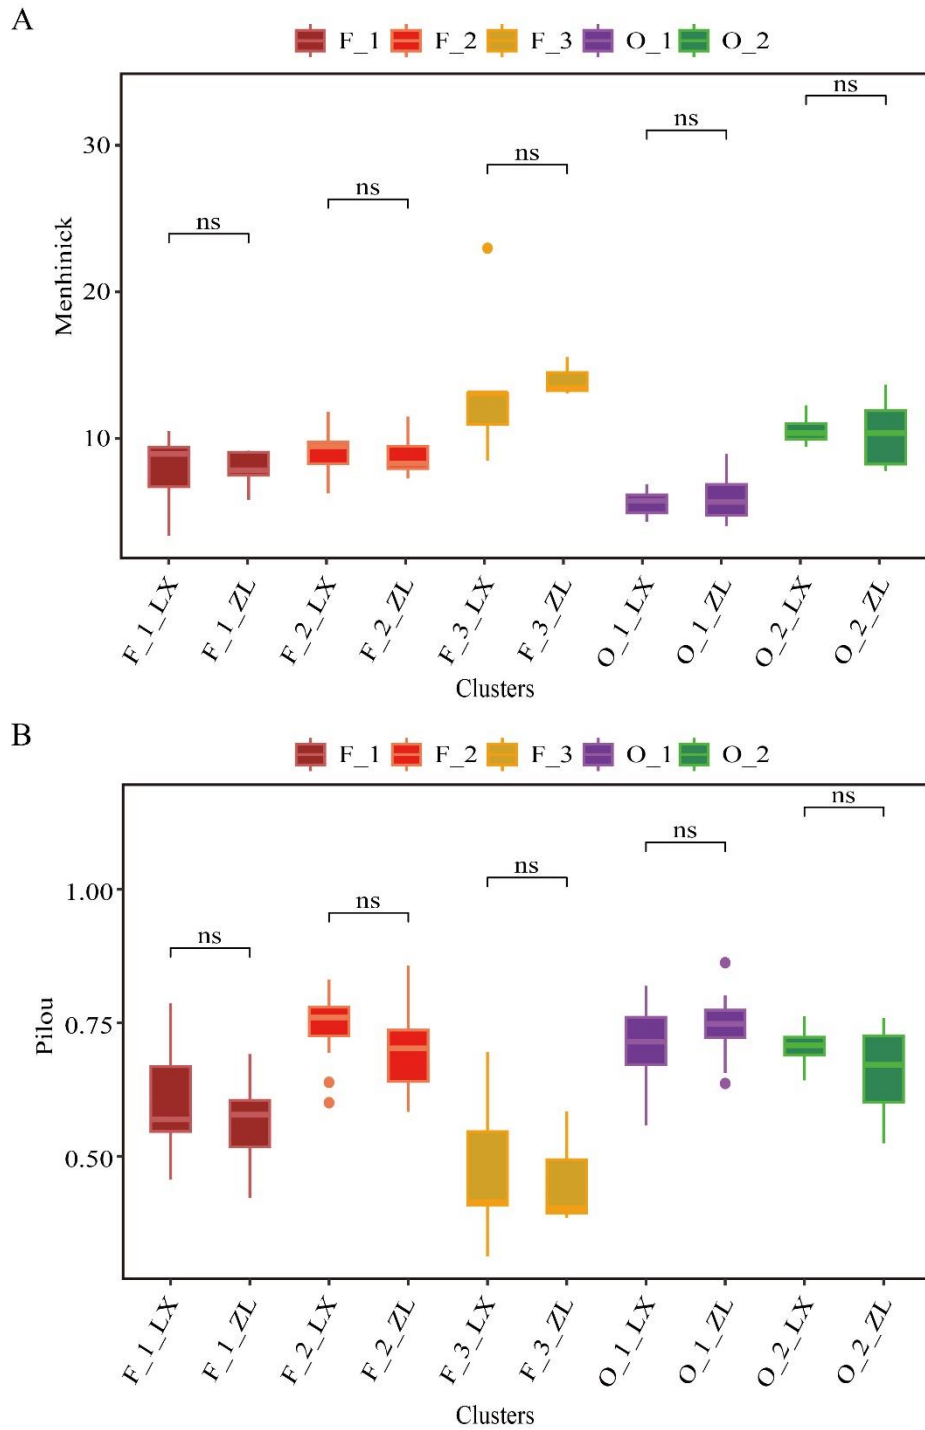

**Supplementary Figure 2** Comparison of microbial richness and evenness within fecal and oral microbiota subclusters in BTN and PTC patients. **(A)** Richness across different samples within subcluster. **(B)** Evenness across different samples within subcluster. ns: no significance. ns, not significant.

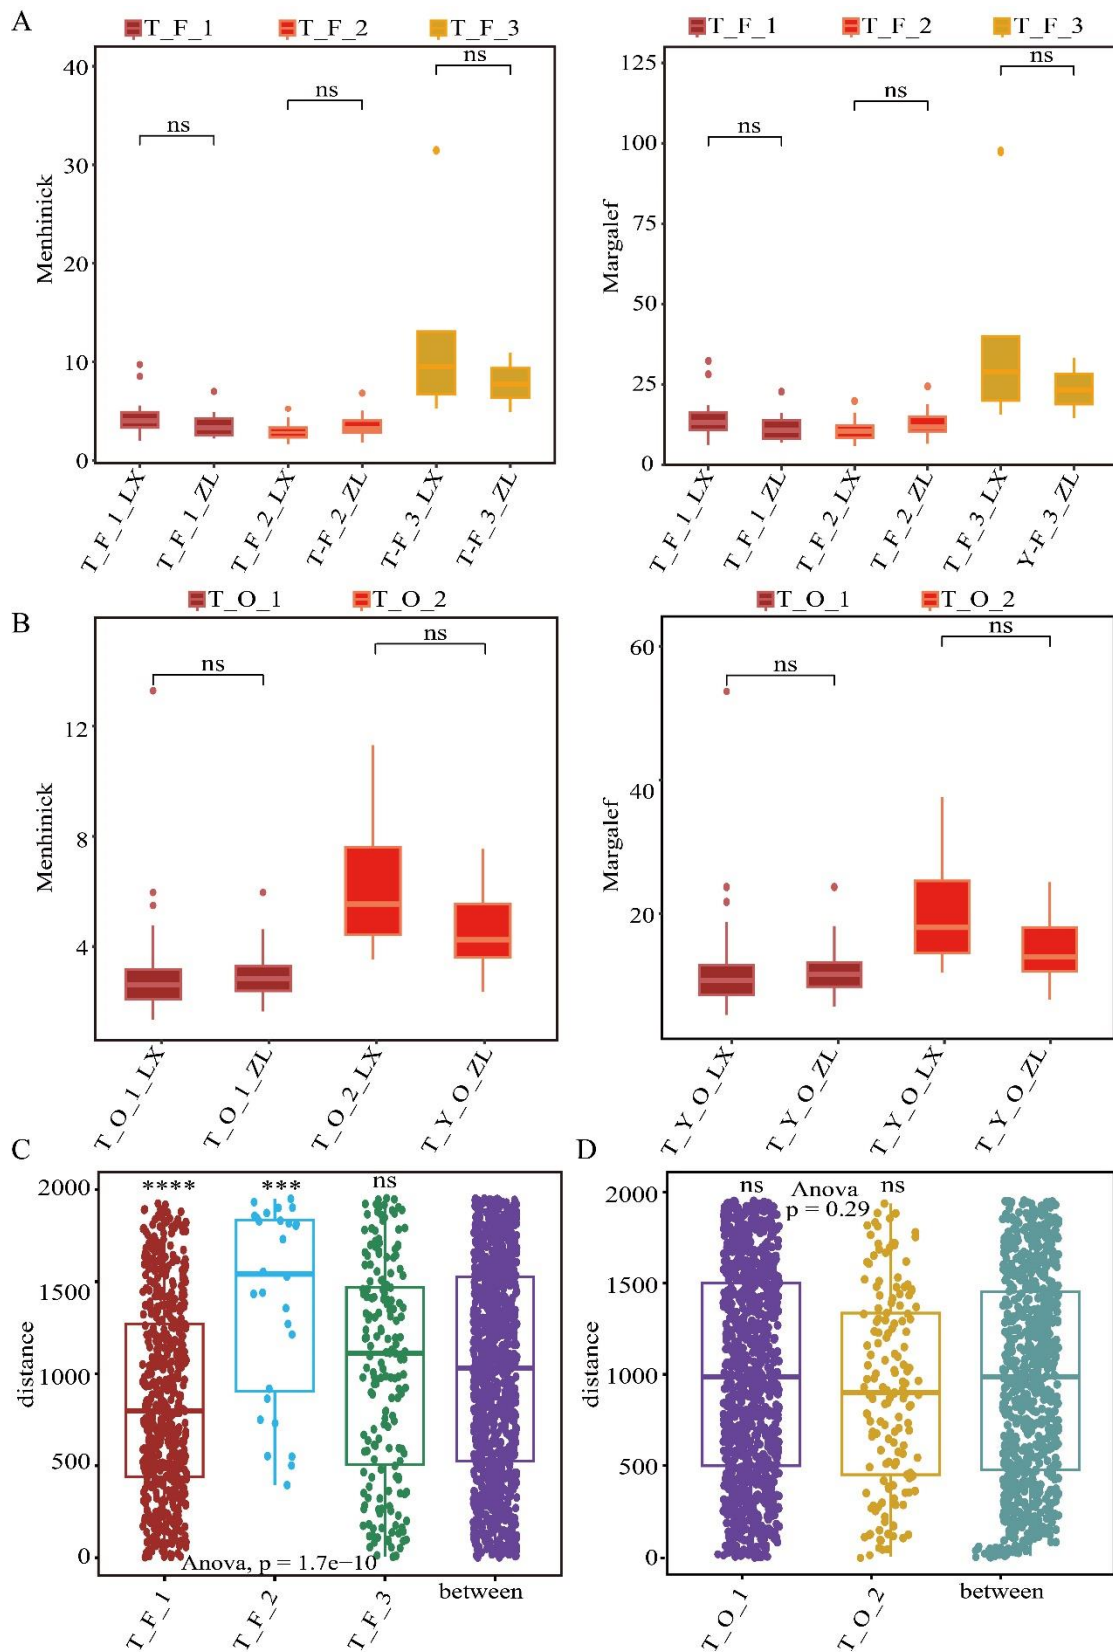

**Supplementary Figure 3** Comparison of  $\alpha$ -diversity and  $\beta$ -diversity within tissue microbiota subclusters in BTN and PTC patients. **(A)** Richness across different samples

within tissue subcluster corresponding to fecal cluster. **(B)** Richness across different samples within tissue subcluster corresponding to fecal cluster. **(C)**  $\beta$ -diversity of tissue cluster corresponding to fecal cluster. **(D)**  $\beta$ -diversity of tissue cluster corresponding to oral cluster. \*\*\* $p < 0.001$ , \*\*\*\* $p < 0.0001$ ; ns, not significant.

**Supplementary Table 1** Primers sequences used for sequencing

| <b>Primers for 16S rRNA</b>    |                                                                                         |
|--------------------------------|-----------------------------------------------------------------------------------------|
| Regions                        |                                                                                         |
| V3-V4                          | 341F: 5'-CCTACGGGNGGCWGCAG-3'                                                           |
|                                | 805R: 5'-GACTACHVGGGTATCTAATCC-3'                                                       |
| <b>Primers for 5R 16S rRNA</b> |                                                                                         |
| Regions                        | First round                                                                             |
| V2                             | F1: 5'-TGGCGAACGGGTGAGTAA-3'                                                            |
|                                | R1: 5'-AGACGTGTGCTCTTCCGATCTCCGTGTCTCAGTCCCARTG-3'                                      |
| V3                             | F2: 5'-ACTCCTACGGGAGGCAGC-3'                                                            |
|                                | R2: 5'-AGACGTGTGCTCTTCCGATCTGTATTACCGCGGCTGCTG-3'                                       |
| V5                             | F3: 5'-GTGTAGCGGTGRAATGCG-3'                                                            |
|                                | R3: 5'-AGACGTGTGCTCTTCCGATCTCCCGTCAATTCMTTGGAGTT-3                                      |
| V6                             | F4: 5'-GGAGCATGTGGWTTAATTCGA-3                                                          |
|                                | R4: 5'-AGACGTGTGCTCTTCCGATCTCGTTGCGGGACTTAACCC-3'                                       |
| V8                             | F5: 5'-GGAGGAAGGTGGGGATGAC-3'                                                           |
|                                | R5: 5'-AGACGTGTGCTCTTCCGATCTAAGGCCCGGGAACGTATT-3'                                       |
| Regions                        | Second round                                                                            |
| V2                             | FF1:5'AATGATACGGCGACCACCGAGATCTACACTCTTCCCTACACGACGCTCTTCCGATCTTGGCGAACGGGTGAGTAA-3'    |
| V3                             | FF2:5'AATGATACGGCGACCACCGAGATCTACACTCTTCCCTACACGACGCTCTTCCGATCTACTCCTACGGGAGGCAGC-3'    |
| V5                             | FF3:5'AATGATACGGCGACCACCGAGATCTACACTCTTCCCTACACGACGCTCTTCCGATCTGTGTAGCGGTGRAATGCG-3'    |
| V6                             | FF4:5'AATGATACGGCGACCACCGAGATCTACACTCTTCCCTACACGACGCTCTTCCGATCTGGAGCATGTGGWTTAATTCGA-3' |
| V8                             | FF5:5'AATGATACGGCGACCACCGAGATCTACACTCTTCCCTACACGACGCTCTTCCGATCTGGAGGAAGGTGGGGATGAC-3'   |
| Common reverse primer          | RR5:5'CAAGCAGAAGACGGCATACGAGATNNNNNNNNGTGACTGGAGTTCAGACGTGTGCTCTTCCGATCT-3'             |

**Supplementary Table 2** Sequencing data statistics of oral and fecal samples

| Oral       | Sample ID | Reads | Q30 (%) | GC (%) | Fecal      | Sample ID | Reads | Q30 (%) | GC (%) |
|------------|-----------|-------|---------|--------|------------|-----------|-------|---------|--------|
| <b>PTC</b> | O_ZL_32   | 75872 | 93.25   | 52.27  | <b>PTC</b> | F_ZL_32   | 59936 | 93.53   | 53.75  |
|            | O_ZL_31   | 75053 | 93.15   | 51.61  |            | F_ZL_31   | 55189 | 93.43   | 53.91  |
|            | O_ZL_30   | 75684 | 90.92   | 51.86  |            | F_ZL_30   | 68704 | 92.94   | 53.97  |
|            | O_ZL_29   | 79784 | 93.37   | 52.95  |            | F_ZL_29   | 72716 | 91.56   | 52.40  |
|            | O_ZL_28   | 78775 | 93.98   | 51.51  |            | F_ZL_28   | 75884 | 93.26   | 54.15  |
|            | O_ZL_27   | 68014 | 93.14   | 53.20  |            | F_ZL_27   | 69282 | 93.11   | 53.79  |
|            | O_ZL_26   | 75507 | 93.32   | 51.95  |            | F_ZL_26   | 70681 | 93.53   | 53.32  |
|            | O_ZL_25   | 75149 | 93.56   | 51.91  |            | F_ZL_25   | 63830 | 92.85   | 51.57  |
|            | O_ZL_24   | 72850 | 93.61   | 50.16  |            | F_ZL_24   | 72264 | 93.18   | 53.07  |
|            | O_ZL_23   | 75723 | 93.51   | 52.19  |            | F_ZL_23   | 73977 | 93.82   | 55.30  |
|            | O_ZL_22   | 79721 | 93.56   | 52.37  |            | F_ZL_22   | 65574 | 92.65   | 52.33  |
|            | O_ZL_21   | 76045 | 93.98   | 51.66  |            | F_ZL_21   | 66018 | 91.36   | 52.08  |
|            | O_ZL_20   | 75842 | 94.17   | 51.98  |            | F_ZL_20   | 55998 | 93.97   | 56.78  |
|            | O_ZL_19   | 76550 | 93.29   | 51.67  |            | F_ZL_19   | 57998 | 93.71   | 54.21  |
|            | O_ZL_18   | 79183 | 93.32   | 52.48  |            | F_ZL_18   | 71460 | 93.38   | 54.58  |
|            | O_ZL_17   | 76252 | 93.38   | 52.10  |            | F_ZL_17   | 73297 | 93.73   | 56.93  |
|            | O_ZL_16   | 79213 | 93.53   | 52.79  |            | F_ZL_16   | 62957 | 93.68   | 52.11  |
|            | O_ZL_15   | 72643 | 92.99   | 52.09  |            | F_ZL_15   | 68489 | 93.55   | 53.35  |
|            | O_ZL_14   | 72895 | 92.12   | 52.07  |            | F_ZL_14   | 72963 | 93.61   | 53.59  |
|            | O_ZL_13   | 80785 | 94.10   | 51.58  |            | F_ZL_13   | 64268 | 93.80   | 54.28  |
|            | O_ZL_12   | 67909 | 94.22   | 51.73  |            | F_ZL_12   | 69949 | 92.38   | 52.78  |
|            | O_ZL_11   | 68197 | 93.76   | 51.72  |            | F_ZL_11   | 65137 | 93.45   | 53.31  |
|            | O_ZL_10   | 76150 | 93.70   | 52.57  |            | F_ZL_10   | 73400 | 93.48   | 53.10  |
|            | O_ZL_9    | 77844 | 93.38   | 51.48  |            | F_ZL_9    | 66868 | 93.39   | 54.99  |
|            | O_ZL_8    | 78256 | 93.72   | 52.48  |            | F_ZL_8    | 53514 | 94.01   | 52.25  |
|            | O_ZL_7    | 69747 | 93.55   | 52.80  |            | F_ZL_7    | 66870 | 94.13   | 54.67  |
|            | O_ZL_6    | 78347 | 90.90   | 51.93  |            | F_ZL_6    | 66001 | 93.36   | 52.03  |
|            | O_ZL_5    | 76922 | 94.40   | 52.66  |            | F_ZL_5    | 58215 | 90.30   | 54.28  |
|            | O_ZL_4    | 75119 | 92.14   | 51.98  |            | F_ZL_4    | 75650 | 92.09   | 52.03  |
|            | O_ZL_3    | 73725 | 94.12   | 52.19  |            | F_ZL_3    | 68488 | 92.97   | 52.29  |
|            | O_ZL_2    | 79120 | 92.31   | 53.69  |            | F_ZL_2    | 59367 | 93.06   | 53.70  |
|            | O_ZL_1    | 73935 | 90.67   | 53.58  |            | F_ZL_1    | 73158 | 91.69   | 52.96  |
| <b>BTN</b> | O_LX_32   | 74430 | 89.41   | 50.87  | <b>BTN</b> | F_LX_32   | 66128 | 93.42   | 56.32  |
|            | O_LX_31   | 71404 | 91.55   | 52.49  |            | F_LX_31   | 72138 | 93.33   | 53.39  |
|            | O_LX_30   | 68389 | 92.26   | 51.59  |            | F_LX_30   | 69497 | 92.99   | 54.98  |
|            | O_LX_29   | 68989 | 91.71   | 52.50  |            | F_LX_29   | 67592 | 92.22   | 53.29  |
|            | O_LX_28   | 78535 | 91.72   | 52.48  |            | F_LX_28   | 67358 | 91.20   | 53.71  |
|            | O_LX_27   | 73041 | 93.45   | 52.47  |            | F_LX_27   | 63584 | 91.84   | 52.97  |
|            | O_LX_26   | 71399 | 91.63   | 52.78  |            | F_LX_26   | 46456 | 92.99   | 53.68  |

|  |         |       |       |       |  |         |       |       |       |
|--|---------|-------|-------|-------|--|---------|-------|-------|-------|
|  | O_LX_25 | 65834 | 92.59 | 52.69 |  | F_LX_25 | 62004 | 93.01 | 54.60 |
|  | O_LX_24 | 73425 | 90.44 | 53.25 |  | F_LX_24 | 70518 | 92.77 | 52.63 |
|  | O_LX_23 | 65715 | 91.91 | 52.69 |  | F_LX_23 | 64267 | 92.68 | 52.59 |
|  | O_LX_22 | 79521 | 92.25 | 50.84 |  | F_LX_22 | 54967 | 91.91 | 57.00 |
|  | O_LX_21 | 73250 | 91.70 | 53.20 |  | F_LX_21 | 72673 | 92.10 | 54.17 |
|  | O_LX_20 | 70792 | 93.58 | 52.18 |  | F_LX_20 | 71705 | 91.37 | 54.87 |
|  | O_LX_19 | 76579 | 91.57 | 51.52 |  | F_LX_19 | 72608 | 92.68 | 56.66 |
|  | O_LX_18 | 66007 | 91.77 | 52.18 |  | F_LX_18 | 64244 | 92.32 | 54.65 |
|  | O_LX_17 | 63632 | 93.13 | 53.62 |  | F_LX_17 | 61215 | 93.98 | 54.58 |
|  | O_LX_16 | 72016 | 90.17 | 52.18 |  | F_LX_16 | 77212 | 93.41 | 52.12 |
|  | O_LX_15 | 69948 | 91.27 | 51.72 |  | F_LX_15 | 67387 | 90.80 | 53.43 |
|  | O_LX_14 | 79991 | 92.45 | 51.93 |  | F_LX_14 | 59048 | 92.49 | 54.44 |
|  | O_LX_13 | 66055 | 91.78 | 52.20 |  | F_LX_13 | 74781 | 93.87 | 53.64 |
|  | O_LX_12 | 78747 | 93.10 | 53.38 |  | F_LX_12 | 69982 | 90.74 | 53.54 |
|  | O_LX_11 | 77773 | 92.73 | 52.34 |  | F_LX_11 | 76177 | 91.71 | 55.86 |
|  | O_LX_10 | 75588 | 91.76 | 52.26 |  | F_LX_10 | 66394 | 91.09 | 52.95 |
|  | O_LX_9  | 71060 | 91.82 | 52.26 |  | F_LX_9  | 65269 | 91.53 | 54.45 |
|  | O_LX_8  | 67595 | 89.61 | 52.15 |  | F_LX_8  | 66728 | 91.74 | 54.54 |
|  | O_LX_7  | 71619 | 91.17 | 52.91 |  | F_LX_7  | 60051 | 90.52 | 52.62 |
|  | O_LX_6  | 79486 | 92.10 | 52.56 |  | F_LX_6  | 55578 | 92.08 | 52.76 |
|  | O_LX_5  | 71679 | 91.75 | 52.72 |  | F_LX_5  | 57849 | 90.47 | 52.74 |
|  | O_LX_4  | 68798 | 91.41 | 52.27 |  | F_LX_4  | 65670 | 90.32 | 53.45 |
|  | O_LX_3  | 79339 | 93.15 | 53.81 |  | F_LX_3  | 67574 | 91.35 | 53.24 |
|  | O_LX_2  | 76386 | 92.15 | 53.87 |  | F_LX_2  | 62407 | 91.76 | 51.99 |
|  | O_LX_1  | 74763 | 93.32 | 51.74 |  | F_LX_1  | 57124 | 91.64 | 55.17 |

PTC, Papillary thyroid carcinoma; BTN, Benign thyroid nodules

**Supplementary Table 3** The alpha diversity index of gut microbial community clusters and oral microbial community clusters.

| Alpha diversity | Menhinick index |                |        |       | Pilou evenness |                |       |       |
|-----------------|-----------------|----------------|--------|-------|----------------|----------------|-------|-------|
|                 | Mean            | Standard Error | Max    | Min   | Mean           | Standard Error | Max   | Min   |
| <b>F_1</b>      | 7.949           | 1.845          | 10.51  | 3.354 | 0.59           | 0.093          | 0.786 | 0.422 |
| <b>F_2</b>      | 8.92            | 1.281          | 11.832 | 6.254 | 0.723          | 0.073          | 0.857 | 0.583 |
| <b>F_3</b>      | 13.833          | 4.232          | 22.981 | 8.485 | 0.469          | 0.127          | 0.695 | 0.313 |
| <b>O_1</b>      | 5.761           | 1.015          | 8.944  | 4.025 | 0.723          | 0.065          | 0.863 | 0.558 |
| <b>O_2</b>      | 10.41           | 1.835          | 13.671 | 7.778 | 0.67           | 0.075          | 0.762 | 0.524 |

**Supplementary Table 4** The beta diversity index of gut microbial community clusters and oral microbial community clusters

| <b>Clusters</b> | <b>Mean</b> | <b>Standard Error</b> | <b>Max</b> | <b>Min</b> | <b>p</b>  | <b>p.adjust</b> |
|-----------------|-------------|-----------------------|------------|------------|-----------|-----------------|
| F_1             | 2291.077    | 860.528               | 4350       | 7          | 5.28E-175 | 5.30E-175       |
| F_2             | 652.357     | 575.468               | 1740       | 9          | 3.26E-18  | 3.30E-18        |
| F_3             | 2585.389    | 1236.423              | 5809       | 5          | 1.23E-47  | 1.20E-47        |
| O_1             | 998.078     | 765.697               | 3657       | 1          | 0         | 0               |
| O_2             | 531.706     | 352.058               | 1488       | 12         | 1.36E-93  | 1.40E-93        |
| between         | 4742.291    | 1968.695              | 7875       | 61         | -         | -               |

P values were obtained by comparing each cluster with between.

**Supplementary Table 5** Sequencing data statistics of tissue samples

| Tissue | Sample ID | Reads  | Q30 (%) | GC (%) | Tissue | Sample ID | Reads  | Q30 (%) | GC (%) |
|--------|-----------|--------|---------|--------|--------|-----------|--------|---------|--------|
| PTC    | T_ZL_32   | 192305 | 94.96   | 54.91  | BTN    | T_LX_32   | 175303 | 97.25   | 55.03  |
|        | T_ZL_31   | 161996 | 93.97   | 55.62  |        | T_LX_31   | 153509 | 91.94   | 58.39  |
|        | T_ZL_30   | 189532 | 93.69   | 55.33  |        | T_LX_30   | 183546 | 92.16   | 57.86  |
|        | T_ZL_29   | 187370 | 95.46   | 55.22  |        | T_LX_29   | 181206 | 94.50   | 55.95  |
|        | T_ZL_28   | 189655 | 95.78   | 56.92  |        | T_LX_28   | 186612 | 93.88   | 56.45  |
|        | T_ZL_27   | 197417 | 95.20   | 54.98  |        | T_LX_27   | 182978 | 94.97   | 54.84  |
|        | T_ZL_26   | 187972 | 94.47   | 55.53  |        | T_LX_26   | 190145 | 94.93   | 54.92  |
|        | T_ZL_25   | 192553 | 93.80   | 56.40  |        | T_LX_25   | 189315 | 94.31   | 55.67  |
|        | T_ZL_24   | 195426 | 94.16   | 56.47  |        | T_LX_24   | 186551 | 94.76   | 54.75  |
|        | T_ZL_23   | 176412 | 93.17   | 56.30  |        | T_LX_23   | 185301 | 93.16   | 56.88  |
|        | T_ZL_22   | 193672 | 93.71   | 55.93  |        | T_LX_22   | 197959 | 93.56   | 55.99  |
|        | T_ZL_21   | 183847 | 95.30   | 55.28  |        | T_LX_21   | 177517 | 94.45   | 57.63  |
|        | T_ZL_20   | 181758 | 93.48   | 56.82  |        | T_LX_20   | 188183 | 93.53   | 56.55  |
|        | T_ZL_19   | 188937 | 95.78   | 55.02  |        | T_LX_19   | 187878 | 96.28   | 53.36  |
|        | T_ZL_18   | 196135 | 94.72   | 54.95  |        | T_LX_18   | 191688 | 94.80   | 55.31  |
|        | T_ZL_17   | 193239 | 94.81   | 57.30  |        | T_LX_17   | 188162 | 96.53   | 54.85  |
|        | T_ZL_16   | 193699 | 94.15   | 56.02  |        | T_LX_16   | 173092 | 95.97   | 55.23  |
|        | T_ZL_15   | 175628 | 93.58   | 56.34  |        | T_LX_15   | 191866 | 96.11   | 54.03  |
|        | T_ZL_14   | 193896 | 94.42   | 56.67  |        | T_LX_14   | 196460 | 94.86   | 55.60  |
|        | T_ZL_13   | 193832 | 95.05   | 55.61  |        | T_LX_13   | 194631 | 95.69   | 54.59  |
|        | T_ZL_12   | 197851 | 94.95   | 55.84  |        | T_LX_12   | 189867 | 94.06   | 56.17  |
|        | T_ZL_11   | 186029 | 95.47   | 55.47  |        | T_LX_11   | 193968 | 95.67   | 54.67  |
|        | T_ZL_10   | 181791 | 94.59   | 58.34  |        | T_LX_10   | 197186 | 94.71   | 54.80  |
|        | T_ZL_9    | 194144 | 94.06   | 57.47  |        | T_LX_9    | 182243 | 94.83   | 55.12  |
|        | T_ZL_8    | 165338 | 94.11   | 58.58  |        | T_LX_8    | 194005 | 94.93   | 55.13  |
|        | T_ZL_7    | 191861 | 90.77   | 62.62  |        | T_LX_7    | 196103 | 94.40   | 55.36  |
|        | T_ZL_6    | 181418 | 91.98   | 60.76  |        | T_LX_6    | 180707 | 94.55   | 56.16  |
|        | T_ZL_5    | 188009 | 94.03   | 59.15  |        | T_LX_5    | 180278 | 94.94   | 55.78  |
|        | T_ZL_4    | 187347 | 93.98   | 58.22  |        | T_LX_4    | 188127 | 93.16   | 56.89  |
|        | T_ZL_3    | 174218 | 94.48   | 57.43  |        | T_LX_3    | 182942 | 96.31   | 53.98  |
|        | T_ZL_2    | 186066 | 94.66   | 55.47  |        | T_LX_2    | 184323 | 95.12   | 55.12  |
|        | T_ZL_1    | 191029 | 93.98   | 56.70  |        | T_LX_1    | 177324 | 96.03   | 54.48  |

PTC, Papillary thyroid carcinoma; BTN, Benign thyroid nodules

**Supplementary Table 6** Logistic regression analysis of gut Menhinick index and oral Menhinick index versus tumor

|                | <b>Estimate</b> | <b>Standard error</b> | <b>z-value</b> | <b>p-value</b> |
|----------------|-----------------|-----------------------|----------------|----------------|
| Intercept      | 0.61            | 0.25                  | 2.51           | 0.01           |
| Gut Menhinick  | 0.08            | 0.02                  | 4.61           | 3.98e-06       |
| Oral Menhinick | 56              | 0.02                  | 1.08           | 0.28           |
